# Supplementary material for: Directional sensing based on flexible aligned carbon nanotube film nanocomposites
Source: Royal Society of Chemistry journal article supplement (doi:10.1039/c8nr02137f), 2018-01-01
Supplement: c8nr02137f1.pdf [file c8nr02137f1.pdf]

## Supporting Information

### **Directional Sensing Based on Flexible Aligned Carbon Nanotube Film**

#### **Nanocomposites**

Chao Sui<sup>a,b,#</sup>, Yingchao Yang<sup>c,#</sup>, Robert J. Headrick<sup>d,#</sup>, Zixuan Pan<sup>a</sup>, Jianyang Wu<sup>f</sup>,

Jing Zhang<sup>a</sup>, Chao Wang<sup>a,b,\*</sup>, Xiaodong He<sup>b</sup>, Matteo Pasquali<sup>d,e</sup>, Jun Lou<sup>a,\*</sup>

<sup>a</sup>Department of Materials Science and NanoEngineering, Rice University, 6100 Main Street, Houston, TX 77005, USA

<sup>b</sup>National Key Laboratory of Science and Technology on Advanced Composites in Special Environments, Harbin Institute of Technology, Harbin 150080, China

<sup>c</sup>Department of Mechanical Engineering, University of Maine, 5711 Boardman Hall, Orono, ME 04469, USA

<sup>d</sup>Department of Chemistry, Rice University, 6100 Main Street, Houston, TX 77005, USA

<sup>e</sup>Department of Chemical and Biomolecular Engineering, Rice University, 6100 Main Street, Houston, TX 77005, USA

<sup>f</sup>Department of Physics, Research Institute for Biomimetics and Soft Matter, Fujian Provincial Key Laboratory for Soft Functional Materials Research, Xiamen University, Xiamen 361005, China

<sup>#</sup>C. Sui, Y.C. Yang, and R. J. Headrick contribute equally.

\*Corresponding Email: chaowang@hit.edu.cn; jlou@rice.edu

**Section 1:** CGMD simulation of aligned SWCNT film with entanglements.

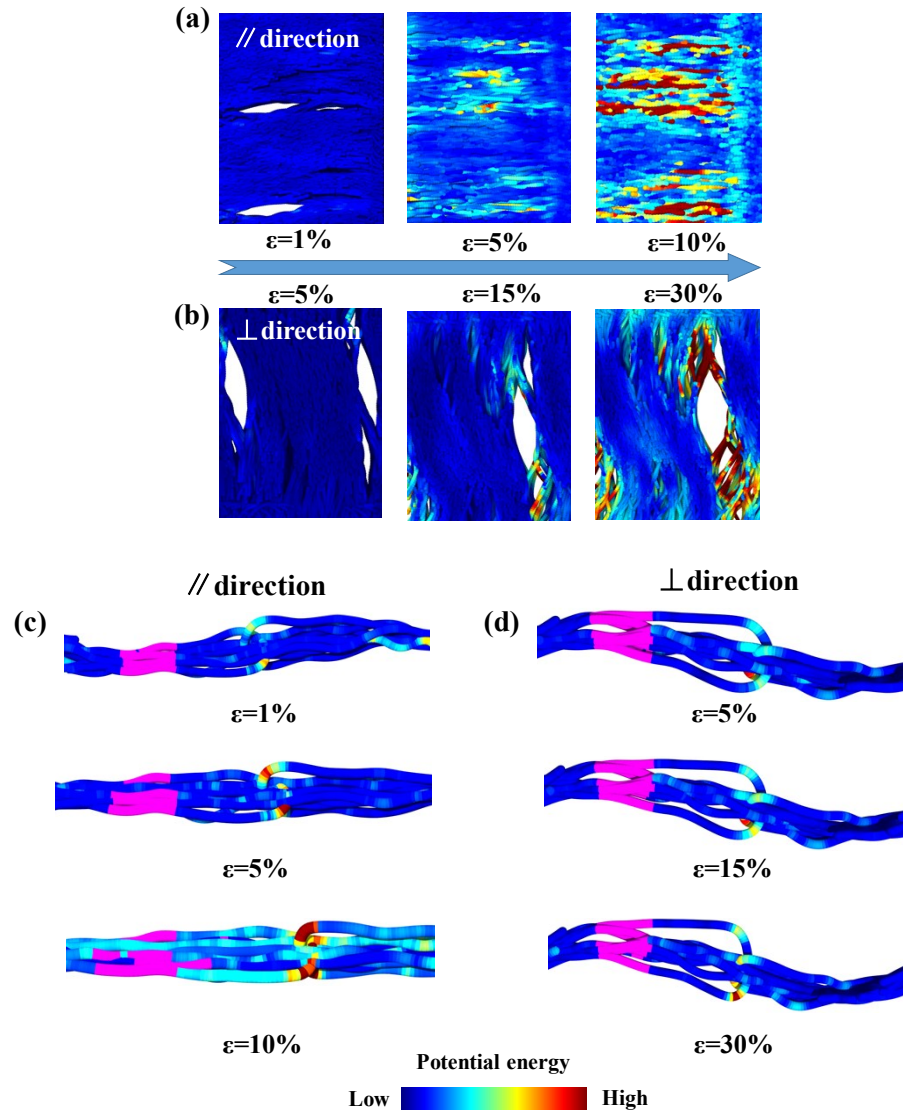

**Fig. S1.** CGMD simulation for the case that the entanglement was considered, where the interlocking effect on stress-transfer and failure fashions was presented.

**Section 2:** Electrical testing system and micromechanical tester.

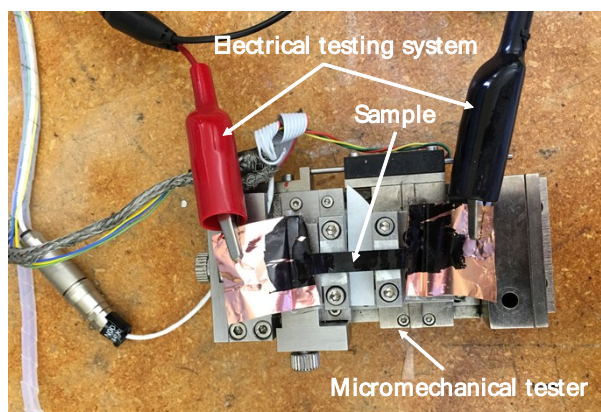

**Fig. S2.** Image for setup of electromechanical measurement, where the SWCNT film composite was fixed on the micro-tester and the copper electrodes were connected with an electrical measurement system.

**Section 3:** Sample preparation of single aligned SWCNT film for in situ tensile test.

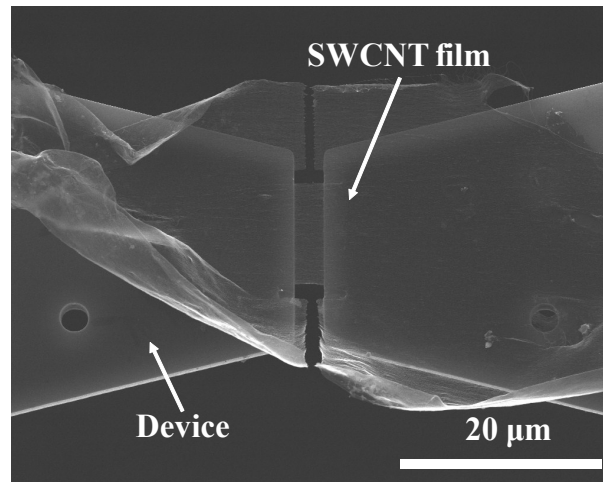

**Fig. S3.** SEM image for fixing a SWCNT film onto a micromechanical device, where the testing region was cut into a rectangular shape using FIB.
